# Supplementary material for: Cannabinoid type 2 receptors in dopamine neurons inhibits psychomotor behaviors, alters anxiety, depression and alcohol preference
Source: PubMed Central journal article supplement (PMC5727179; doi:10.1038/s41598-017-17796-y), 2017-12-12
Supplement: 41598_2017_17796_MOESM1_ESM.pdf [file 41598_2017_17796_MOESM1_ESM.pdf]

# **Cannabinoid type 2 receptors in dopamine neurons inhibits psychomotor behaviors, alters anxiety, depression and alcohol preference**

Qing-Rong Liu<sup>1,2</sup>, Ana Canseco-Alba<sup>1</sup>, Hai-Ying Zhang<sup>3</sup>, Patricia Tagliaferro<sup>1</sup>, Monika Chung<sup>1</sup>, Eugene Dennis<sup>1</sup>, Branden Sanabria<sup>1</sup>, Norman Schanz<sup>1</sup>, Joao Carlos Escosteguy-Neto<sup>1</sup>, Hiroki Ishiguro<sup>4</sup>, Zhicheng Lin<sup>5</sup>, Susan Sgro<sup>1</sup>, Claire M. Leonard<sup>1</sup>, Jair Guilherme Santos-Junior<sup>6</sup>, Eliot L. Gardner<sup>3</sup>, Josephine M. Egan<sup>2</sup>, Jeung Woon Lee<sup>1</sup>, Zheng-Xiong Xi<sup>3</sup>, & Emmanuel S. Onaivi<sup>1</sup>

## **SUPPLEMENTARY METHODS AND DATA**

### **Human CNR2 GWAS analysis**

The GWAS secondary analysis used dbGaP three datasets, Collaborative Study on the Genetics of Alcoholism (COGA, phs000125.v1.p1), Study of Addiction: Genetics and Environment (SAGE, phs000092.v1.p1) and the Australian twin-family study of alcohol use disorder (OZALC, phs000181.v1.p1). COGA had two ethnicities US Caucasians and African American so after data quality control (QC) <sup>60</sup>, the dataset was split into two cohorts, US Caucasians and African Americans. Only the unrelated individuals were extracted from the OZALC sample for the purpose of epistasis analysis. After QC, a total of 6,596 unrelated subjects remained, including approximately 41.0% cases. Imputation was carried out as described before <sup>61</sup>, in order to extend the association power. Data manipulation, allelic association and meta-analysis were all performed by using PLINK <sup>62</sup> and meta-analysis of the three dbGaP GWAS datasets for CNR2 association with Parkinson's disease as previously determined <sup>64, 65</sup>.

**SUPPLEMENTARY FIGURE S1. Human CNR2 gene association with SUD, based on dbGaP datasets.** Human CNR2 gene association with SUD, based on dbGaP datasets. Data are

results from meta-analysis of three GWAS studies, including COGA, SAGE and the Australian Twins study, together with a total of 6,596 subjects. X axis is coordinate in chr1, Y axis is significance of association in the form of  $-\text{Log}_{10}(\text{P-value})$ . Blue line is nominal significance of  $P \leq 0.05$ . Aquamarine, CNR2 gene structure corresponding to chr1, running in the minus strand of the chromosome. Red arrow, the most significant association via SNP rs3123557.

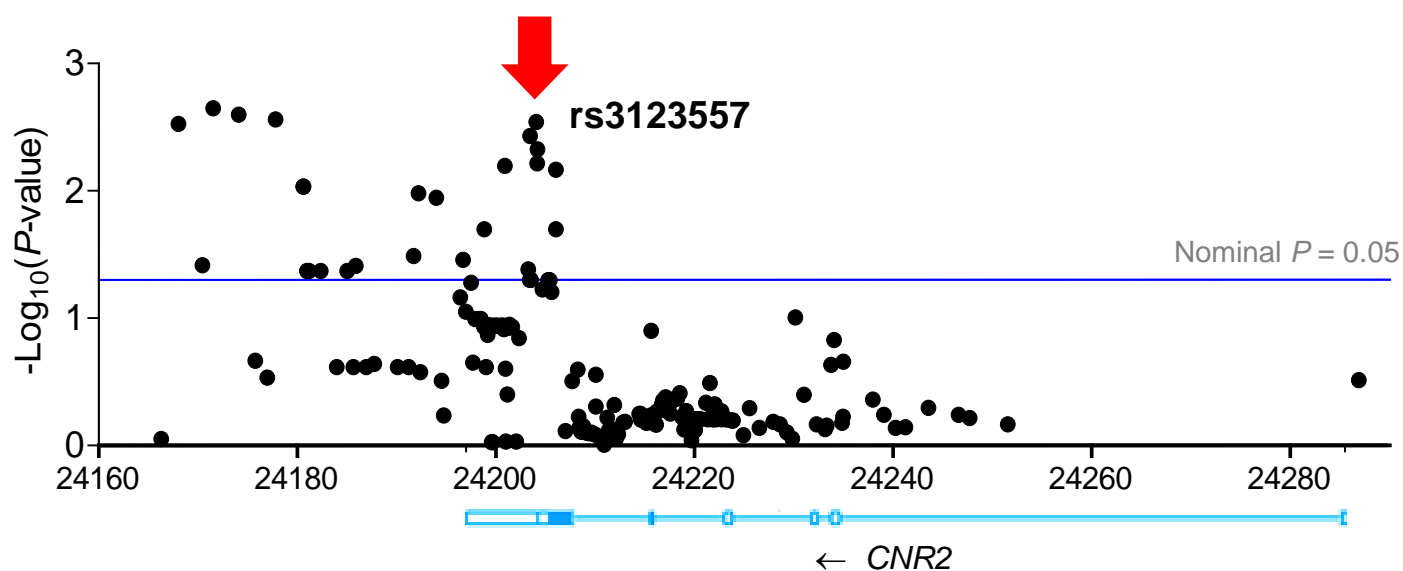

**Table S1. Results of meta-analysis of three of dbGaP GWAS datasets for CNR2 association with PD.**

| CHR | BP       | SNP        | A1 | A2 | N | P(R)    | OR(R)  |       |
|-----|----------|------------|----|----|---|---------|--------|-------|
| 1   | 24153608 | rs7521571  | G  | A  | 2 | 0.02003 | 0.9124 |       |
| 1   | 24166191 | rs12123991 | A  | G  | 2 | 0.6659  | 0.979  |       |
| 1   | 24168019 | rs12744386 | T  | C  | 3 | 0.3578  | 0.9682 |       |
| 1   | 24171543 | rs4649119  | G  | C  | 3 | 0.3752  | 0.9693 |       |
| 1   | 24174093 | rs10917431 | G  | T  | 3 | 0.3669  | 0.9688 |       |
| 1   | 24177800 | rs72874118 | G  | A  | 3 | 0.3477  | 0.9675 |       |
| 1   | 24192200 | rs34902309 | G  | A  | 3 | 0.3478  | 0.9675 |       |
| 1   | 24207691 | rs4474201  | G  | T  | 2 | 0.02175 | 0.9132 | 3'UTR |
| 1   | 24219690 | rs7553231  | T  | C  | 2 | 0.9796  | 0.9987 |       |
| 1   | 24230163 | rs6700106  | A  | G  | 2 | 0.5567  | 0.9695 |       |

**Table S2. Results of meta-analysis of three of dbGaP GWAS datasets for CNR2 association with SUD.**

| CHR | BP       | SNP         | A1 | A2 | N | P        | P(R)     | OR     | OR(R)  |
|-----|----------|-------------|----|----|---|----------|----------|--------|--------|
| 1   | 24166289 | rs187512781 | C  | G  | 2 | 0.891    | 0.891    | 0.9752 | 0.9752 |
| 1   | 24168019 | rs12744386  | T  | C  | 3 | 0.002977 | 0.002977 | 1.1213 | 1.1213 |
| 1   | 24170458 | rs10917430  | T  | C  | 2 | 0.03828  | 0.03828  | 1.1087 | 1.1087 |
| 1   | 24171543 | rs4649119   | G  | C  | 3 | 0.002242 | 0.002242 | 1.1249 | 1.1249 |
| 1   | 24174093 | rs10917431  | G  | T  | 3 | 0.002522 | 0.002522 | 1.1233 | 1.1233 |
| 1   | 24175763 | rs12404321  | G  | A  | 2 | 0.2155   | 0.2155   | 1.1016 | 1.1016 |
| 1   | 24176983 | rs77767474  | A  | T  | 2 | 0.2924   | 0.2924   | 1.0853 | 1.0853 |
| 1   | 24177800 | rs72874118  | G  | A  | 3 | 0.002749 | 0.002749 | 1.1227 | 1.1227 |
| 1   | 24180613 | rs35993651  | G  | C  | 2 | 0.009269 | 0.009269 | 1.1303 | 1.1303 |
| 1   | 24180623 | rs35904775  | C  | T  | 2 | 0.009269 | 0.009269 | 1.1303 | 1.1303 |
| 1   | 24180962 | rs13551     | C  | T  | 2 | 0.04256  | 0.04256  | 1.1062 | 1.1062 |
| 1   | 24181177 | rs12748109  | T  | C  | 2 | 0.04256  | 0.04256  | 1.1062 | 1.1062 |
| 1   | 24182348 | rs11803575  | T  | A  | 2 | 0.04256  | 0.04256  | 1.1062 | 1.1062 |
| 1   | 24183981 | rs74223775  | A  | G  | 2 | 0.2422   | 0.2422   | 1.0945 | 1.0945 |
| 1   | 24185025 | rs12755062  | A  | T  | 2 | 0.04256  | 0.04256  | 1.1062 | 1.1062 |
| 1   | 24185648 | rs78199675  | C  | A  | 2 | 0.2422   | 0.2422   | 1.0945 | 1.0945 |
| 1   | 24185877 | rs12141409  | T  | C  | 2 | 0.03876  | 0.03876  | 1.1085 | 1.1085 |
| 1   | 24186934 | rs145447703 | C  | T  | 2 | 0.2422   | 0.2422   | 1.0945 | 1.0945 |
| 1   | 24187738 | rs140967752 | A  | G  | 2 | 0.229    | 0.229    | 1.0974 | 1.0974 |
| 1   | 24190106 | rs143150363 | G  | C  | 2 | 0.2422   | 0.2422   | 1.0945 | 1.0945 |
| 1   | 24191219 | rs12133557  | T  | G  | 2 | 0.2422   | 0.2422   | 1.0945 | 1.0945 |
| 1   | 24191720 | rs34570472  | G  | A  | 3 | 0.03247  | 0.03247  | 1.1048 | 1.1048 |
| 1   | 24192200 | rs34902309  | G  | A  | 4 | 0.007754 | 0.01046  | 1.1023 | 1.1012 |
| 1   | 24192379 | rs74937660  | C  | G  | 2 | 0.2659   | 0.2659   | 1.0904 | 1.0904 |
| 1   | 24194014 | rs3003333   | T  | A  | 2 | 0.01134  | 0.01134  | 1.1267 | 1.1267 |
| 1   | 24194522 | rs4317761   | G  | T  | 3 | 0.3105   | 0.3105   | 1.0441 | 1.0441 |
| 1   | 24194748 | rs2070956   | G  | C  | 3 | 0.5798   | 0.5798   | 1.0394 | 1.0394 |
| 1   | 24196401 | rs3123554   | A  | G  | 3 | 0.0197   | 0.06841  | 1.1073 | 1.0992 |
| 1   | 24196683 | rs4285654   | C  | T  | 3 | 0.01782  | 0.03485  | 1.108  | 1.1047 |
| 1   | 24196957 | rs2503002   | C  | G  | 3 | 0.0208   | 0.08911  | 1.1063 | 1.0962 |
| 1   | 24197512 | rs2503001   | G  | A  | 3 | 0.02284  | 0.05278  | 1.1047 | 1.0995 |
| 1   | 24197696 | rs4649123   | A  | G  | 3 | 0.02621  | 0.2236   | 1.1025 | 1.0815 |
| 1   | 24197898 | rs2503000   | C  | G  | 3 | 0.02142  | 0.1012   | 1.1057 | 1.0945 |
| 1   | 24198321 | rs2502999   | A  | G  | 3 | 0.02142  | 0.1012   | 1.1057 | 1.0945 |
| 1   | 24198327 | rs2502998   | T  | A  | 3 | 0.02142  | 0.1012   | 1.1057 | 1.0945 |
| 1   | 24198441 | rs2502997   | G  | A  | 3 | 0.02391  | 0.1012   | 1.1038 | 1.0933 |
| 1   | 24198479 | rs2501417   | T  | C  | 3 | 0.02142  | 0.1012   | 1.1057 | 1.0945 |
| 1   | 24198804 | rs6680132   | T  | C  | 3 | 0.02363  | 0.1174   | 1.1039 | 1.0916 |
| 1   | 24198840 | rs6672157   | C  | G  | 3 | 0.01636  | 0.01997  | 1.1107 | 1.1098 |

|   |          |            |   |   |   |          |          |        |        |
|---|----------|------------|---|---|---|----------|----------|--------|--------|
| 1 | 24199026 | rs2501423  | A | C | 3 | 0.02697  | 0.2425   | 1.102  | 1.0797 |
| 1 | 24199041 | rs2502996  | T | C | 3 | 0.02211  | 0.1145   | 1.1051 | 1.0927 |
| 1 | 24199182 | rs2501424  | T | C | 3 | 0.03121  | 0.135    | 1.0971 | 1.0858 |
| 1 | 24199290 | rs2502995  | T | C | 3 | 0.02211  | 0.1145   | 1.1051 | 1.0927 |
| 1 | 24199339 | rs2501425  | A | C | 3 | 0.02205  | 0.1136   | 1.1052 | 1.0929 |
| 1 | 24199576 | rs74063322 | C | T | 2 | 0.9412   | 0.9412   | 0.987  | 0.987  |
| 1 | 24199642 | rs6663474  | G | A | 3 | 0.02211  | 0.1145   | 1.1051 | 1.0927 |
| 1 | 24199665 | rs74063324 | A | G | 2 | 0.9406   | 0.9406   | 0.9868 | 0.9868 |
| 1 | 24199869 | rs3003334  | G | A | 3 | 0.02211  | 0.1145   | 1.1051 | 1.0927 |
| 1 | 24200052 | rs3003335  | A | G | 3 | 0.02211  | 0.1145   | 1.1051 | 1.0927 |
| 1 | 24200158 | rs6665733  | T | C | 3 | 0.02211  | 0.1145   | 1.1051 | 1.0927 |
| 1 | 24200524 | rs1130321  | C | T | 3 | 0.02211  | 0.1145   | 1.1051 | 1.0927 |
| 1 | 24200606 | rs1130320  | A | G | 3 | 0.02211  | 0.1145   | 1.1051 | 1.0927 |
| 1 | 24200772 | rs1106     | C | G | 3 | 0.02211  | 0.1145   | 1.1051 | 1.0927 |
| 1 | 24200800 | rs1105     | T | C | 3 | 0.03198  | 0.122    | 1.0982 | 1.0876 |
| 1 | 24200903 | rs2229586  | G | C | 2 | 0.006364 | 0.006364 | 1.1369 | 1.1369 |
| 1 | 24200921 | rs2229585  | T | C | 3 | 0.02405  | 0.1183   | 1.1036 | 1.0913 |
| 1 | 24200969 | rs2229584  | T | C | 3 | 0.02405  | 0.1183   | 1.1036 | 1.0913 |
| 1 | 24200983 | rs2229583  | C | T | 3 | 0.02928  | 0.2493   | 1.1005 | 1.0782 |
| 1 | 24201002 | rs2229582  | C | G | 2 | 0.9282   | 0.9282   | 0.9841 | 0.9841 |
| 1 | 24201094 | rs2229581  | G | C | 3 | 0.02405  | 0.1183   | 1.1036 | 1.0913 |
| 1 | 24201109 | rs2229580  | C | T | 3 | 0.02405  | 0.1183   | 1.1036 | 1.0913 |
| 1 | 24201162 | rs2229579  | A | G | 3 | 0.3964   | 0.3964   | 1.066  | 1.066  |
| 1 | 24201262 | rs2502993  | A | G | 3 | 0.02363  | 0.1174   | 1.1039 | 1.0916 |
| 1 | 24201357 | rs4649124  | A | G | 3 | 0.02105  | 0.1126   | 1.106  | 1.0936 |
| 1 | 24201448 | rs3003336  | C | T | 3 | 0.02405  | 0.1183   | 1.1036 | 1.0913 |
| 1 | 24201643 | rs2501431  | G | A | 3 | 0.02363  | 0.1174   | 1.1039 | 1.0916 |
| 1 | 24202055 | rs2506088  | G | A | 3 | 0.9292   | 0.9292   | 1.0069 | 1.0069 |
| 1 | 24202318 | rs2502991  | A | G | 3 | 0.01835  | 0.143    | 1.109  | 1.0923 |
| 1 | 24203246 | rs2501433  | A | G | 3 | 0.01382  | 0.04132  | 1.1142 | 1.1079 |
| 1 | 24203416 | rs6658703  | G | T | 3 | 0.0143   | 0.05005  | 1.1136 | 1.106  |
| 1 | 24203425 | rs2501434  | C | T | 2 | 0.003698 | 0.003698 | 1.1461 | 1.1461 |
| 1 | 24203534 | rs6673210  | A | G | 3 | 0.0143   | 0.05005  | 1.1136 | 1.106  |
| 1 | 24204073 | rs3123557  | C | T | 2 | 0.002879 | 0.002879 | 1.1513 | 1.1513 |
| 1 | 24204143 | rs6424119  | A | G | 2 | 0.006094 | 0.006094 | 1.1381 | 1.1381 |
| 1 | 24204189 | rs6424120  | C | T | 2 | 0.004727 | 0.004727 | 1.1423 | 1.1423 |
| 1 | 24204683 | rs4341315  | C | G | 3 | 0.01475  | 0.05942  | 1.113  | 1.1043 |
| 1 | 24205274 | rs2501367  | C | A | 3 | 0.01429  | 0.0503   | 1.1136 | 1.106  |
| 1 | 24205295 | rs2502990  | C | T | 3 | 0.01429  | 0.0503   | 1.1136 | 1.106  |
| 1 | 24205407 | rs2502989  | G | A | 3 | 0.01429  | 0.0503   | 1.1136 | 1.106  |
| 1 | 24205608 | rs2502988  | T | C | 3 | 0.02007  | 0.06216  | 1.1078 | 1.1002 |
| 1 | 24206032 | rs2501369  | G | A | 3 | 0.01745  | 0.02     | 1.1102 | 1.1095 |
| 1 | 24206053 | rs2501370  | T | C | 2 | 0.006812 | 0.006812 | 1.1368 | 1.1368 |
| 1 | 24206985 | rs6689530  | T | C | 3 | 0.7912   | 0.7693   | 0.9844 | 0.9817 |

|   |          |             |   |   |   |        |        |        |        |
|---|----------|-------------|---|---|---|--------|--------|--------|--------|
| 1 | 24207691 | rs4474201   | G | T | 4 | 0.3109 | 0.3109 | 1.0372 | 1.0372 |
| 1 | 24208236 | rs12727568  | T | C | 2 | 0.2529 | 0.2529 | 0.9096 | 0.9096 |
| 1 | 24208320 | rs76048179  | T | G | 3 | 0.5927 | 0.5927 | 0.9621 | 0.9621 |
| 1 | 24208373 | rs12754324  | C | T | 3 | 0.7308 | 0.7308 | 1.0172 | 1.0172 |
| 1 | 24208574 | rs2506086   | T | G | 3 | 0.7806 | 0.7806 | 0.9787 | 0.9787 |
| 1 | 24208676 | rs2501377   | T | C | 3 | 0.7806 | 0.7806 | 0.9787 | 0.9787 |
| 1 | 24208783 | rs7541711   | C | T | 3 | 0.7042 | 0.7042 | 1.0189 | 1.0189 |
| 1 | 24208789 | rs7541713   | C | A | 3 | 0.7042 | 0.7042 | 1.0189 | 1.0189 |
| 1 | 24208875 | rs7541819   | C | T | 3 | 0.778  | 0.778  | 1.014  | 1.014  |
| 1 | 24208885 | rs7532916   | G | T | 3 | 0.778  | 0.778  | 1.014  | 1.014  |
| 1 | 24208924 | rs114636165 | C | T | 3 | 0.7602 | 0.7602 | 0.9492 | 0.9492 |
| 1 | 24208934 | rs7541841   | C | T | 3 | 0.778  | 0.778  | 1.014  | 1.014  |
| 1 | 24209034 | rs12741866  | A | G | 3 | 0.786  | 0.786  | 1.0135 | 1.0135 |
| 1 | 24209168 | rs12759455  | C | A | 3 | 0.7937 | 0.7937 | 1.013  | 1.013  |
| 1 | 24209378 | rs12733278  | T | C | 3 | 0.8016 | 0.8016 | 1.0125 | 1.0125 |
| 1 | 24209630 | rs12759917  | G | T | 3 | 0.7937 | 0.7937 | 1.013  | 1.013  |
| 1 | 24209971 | rs4625225   | C | T | 3 | 0.8207 | 0.8207 | 1.0112 | 1.0112 |
| 1 | 24210067 | rs7528292   | C | T | 3 | 0.278  | 0.278  | 0.9272 | 0.9272 |
| 1 | 24210080 | rs75296863  | T | C | 3 | 0.4947 | 0.4947 | 1.0469 | 1.0469 |
| 1 | 24210453 | rs7519729   | G | C | 3 | 0.8552 | 0.8552 | 1.009  | 1.009  |
| 1 | 24210894 | rs61778195  | C | A | 2 | 0.9877 | 0.9877 | 0.9991 | 0.9991 |
| 1 | 24211206 | rs76135131  | A | C | 3 | 0.6031 | 0.6031 | 1.0335 | 1.0335 |
| 1 | 24211342 | rs4535949   | G | C | 3 | 0.7661 | 0.7661 | 1.0151 | 1.0151 |
| 1 | 24211913 | rs3923183   | T | C | 3 | 0.4804 | 0.4804 | 0.9501 | 0.9501 |
| 1 | 24212044 | rs4501783   | G | T | 3 | 0.8814 | 0.8814 | 1.0074 | 1.0074 |
| 1 | 24212100 | rs5026902   | C | T | 3 | 0.88   | 0.88   | 1.0076 | 1.0076 |
| 1 | 24212106 | rs183017791 | C | A | 3 | 0.7512 | 0.7512 | 0.9473 | 0.9473 |
| 1 | 24212336 | rs4648919   | G | C | 3 | 0.8137 | 0.8137 | 1.0118 | 1.0118 |
| 1 | 24212829 | rs6424123   | C | T | 3 | 0.6598 | 0.6598 | 1.0223 | 1.0223 |
| 1 | 24212999 | rs7537808   | C | T | 3 | 0.6494 | 0.6494 | 1.023  | 1.023  |
| 1 | 24214430 | rs2501385   | C | T | 3 | 0.5635 | 0.5635 | 1.0348 | 1.0348 |
| 1 | 24214550 | rs2502956   | T | C | 3 | 0.5635 | 0.5635 | 1.0348 | 1.0348 |
| 1 | 24214583 | rs2501386   | A | G | 3 | 0.6252 | 0.6252 | 1.0294 | 1.0294 |
| 1 | 24214721 | rs2501387   | A | G | 3 | 0.6228 | 0.6228 | 1.0293 | 1.0293 |
| 1 | 24214868 | rs2501388   | A | G | 3 | 0.63   | 0.63   | 1.0287 | 1.0287 |
| 1 | 24215130 | rs16828926  | A | G | 3 | 0.6612 | 0.6612 | 1.0278 | 1.0278 |
| 1 | 24215473 | rs61778196  | T | G | 3 | 0.6206 | 0.6206 | 1.0294 | 1.0294 |
| 1 | 24215477 | rs6699263   | T | G | 3 | 0.6206 | 0.6206 | 1.0294 | 1.0294 |
| 1 | 24215574 | rs3003322   | T | C | 3 | 0.6086 | 0.6086 | 1.0305 | 1.0305 |
| 1 | 24215592 | rs6682096   | G | A | 3 | 0.5803 | 0.5803 | 1.0329 | 1.0329 |
| 1 | 24215595 | rs6691618   | C | T | 3 | 0.6143 | 0.6143 | 1.03   | 1.03   |
| 1 | 24215618 | rs2501389   | C | G | 3 | 0.6086 | 0.6086 | 1.0305 | 1.0305 |
| 1 | 24215652 | rs6696395   | A | C | 2 | 0.1256 | 0.1256 | 0.7439 | 0.7439 |
| 1 | 24215662 | rs6424125   | T | G | 3 | 0.6576 | 0.6576 | 1.026  | 1.026  |

|   |          |            |   |   |   |        |        |        |        |
|---|----------|------------|---|---|---|--------|--------|--------|--------|
| 1 | 24215749 | rs7554234  | T | C | 3 | 0.6086 | 0.6086 | 1.0305 | 1.0305 |
| 1 | 24215796 | rs2501390  | A | G | 3 | 0.6086 | 0.6086 | 1.0305 | 1.0305 |
| 1 | 24216118 | rs2501391  | G | A | 3 | 0.6871 | 0.6871 | 1.0235 | 1.0235 |
| 1 | 24216181 | rs2501392  | G | C | 3 | 0.5421 | 0.5421 | 1.0363 | 1.0363 |
| 1 | 24216393 | rs2501393  | T | G | 3 | 0.5282 | 0.5282 | 1.0379 | 1.0379 |
| 1 | 24216541 | rs2502957  | T | C | 3 | 0.5282 | 0.5282 | 1.0379 | 1.0379 |
| 1 | 24216723 | rs2502958  | C | T | 3 | 0.4687 | 0.4687 | 1.0439 | 1.0439 |
| 1 | 24216811 | rs2501395  | T | C | 3 | 0.4417 | 0.4417 | 1.0466 | 1.0466 |
| 1 | 24216861 | rs2502959  | A | C | 3 | 0.449  | 0.449  | 1.0458 | 1.0458 |
| 1 | 24217088 | rs6424126  | A | G | 2 | 0.4174 | 0.4174 | 1.0586 | 1.0586 |
| 1 | 24217092 | rs7541728  | G | A | 3 | 0.4639 | 0.4639 | 1.0438 | 1.0438 |
| 1 | 24217513 | rs2502960  | C | T | 3 | 0.4518 | 0.4518 | 1.0455 | 1.0455 |
| 1 | 24217567 | rs2502961  | A | G | 3 | 0.5608 | 0.5608 | 1.0351 | 1.0351 |
| 1 | 24217620 | rs2501396  | T | A | 3 | 0.4518 | 0.4518 | 1.0455 | 1.0455 |
| 1 | 24217692 | rs2501397  | C | T | 3 | 0.4518 | 0.4518 | 1.0455 | 1.0455 |
| 1 | 24218064 | rs2502964  | A | G | 3 | 0.4283 | 0.4283 | 1.048  | 1.048  |
| 1 | 24218276 | rs2502965  | G | A | 3 | 0.4283 | 0.4283 | 1.048  | 1.048  |
| 1 | 24218530 | rs4285653  | C | T | 3 | 0.3875 | 0.3875 | 0.9546 | 0.9546 |
| 1 | 24218735 | rs3003323  | T | G | 3 | 0.5961 | 0.5961 | 0.9718 | 0.9718 |
| 1 | 24218742 | rs4573477  | G | A | 3 | 0.5961 | 0.5961 | 0.9718 | 0.9718 |
| 1 | 24218814 | rs3003324  | T | C | 3 | 0.5961 | 0.5961 | 0.9718 | 0.9718 |
| 1 | 24218960 | rs2502966  | G | A | 2 | 0.3189 | 0.7479 | 0.8322 | 1.2782 |
| 1 | 24219158 | rs2501398  | G | T | 2 | 0.5365 | 0.5365 | 0.9642 | 0.9642 |
| 1 | 24219234 | rs6424127  | T | C | 3 | 0.6143 | 0.6143 | 0.9732 | 0.9732 |
| 1 | 24219242 | rs6424128  | C | T | 3 | 0.6076 | 0.6076 | 0.9727 | 0.9727 |
| 1 | 24219293 | rs6424129  | G | A | 3 | 0.6004 | 0.6004 | 0.9721 | 0.9721 |
| 1 | 24219374 | rs6424130  | T | C | 3 | 0.5998 | 0.5998 | 0.9721 | 0.9721 |
| 1 | 24219582 | rs7512349  | C | T | 3 | 0.6205 | 0.6205 | 0.9736 | 0.9736 |
| 1 | 24219636 | rs7512373  | C | T | 2 | 0.2575 | 0.6854 | 0.8094 | 0.868  |
| 1 | 24219690 | rs7553231  | T | C | 4 | 0.911  | 0.911  | 0.9952 | 0.9952 |
| 1 | 24219717 | rs2502967  | A | G | 3 | 0.6205 | 0.6205 | 0.9736 | 0.9736 |
| 1 | 24219758 | rs2501399  | C | A | 3 | 0.6205 | 0.6205 | 0.9736 | 0.9736 |
| 1 | 24219800 | rs2501400  | C | T | 3 | 0.6205 | 0.6205 | 0.9736 | 0.9736 |
| 1 | 24219849 | rs2502968  | A | G | 3 | 0.6205 | 0.6205 | 0.9736 | 0.9736 |
| 1 | 24220063 | rs2501401  | A | G | 3 | 0.7568 | 0.7568 | 0.9835 | 0.9835 |
| 1 | 24220278 | rs2502969  | T | C | 3 | 0.6205 | 0.6205 | 0.9736 | 0.9736 |
| 1 | 24220343 | rs2502970  | A | G | 3 | 0.6205 | 0.6205 | 0.9736 | 0.9736 |
| 1 | 24220407 | rs2501402  | G | A | 3 | 0.6205 | 0.6205 | 0.9736 | 0.9736 |
| 1 | 24220606 | rs6424131  | C | A | 3 | 0.6205 | 0.6205 | 0.9736 | 0.9736 |
| 1 | 24221135 | rs12730734 | T | A | 3 | 0.4609 | 0.4609 | 0.9608 | 0.9608 |
| 1 | 24221321 | rs2501403  | T | A | 3 | 0.6205 | 0.6205 | 0.9736 | 0.9736 |
| 1 | 24221539 | rs28735813 | G | A | 3 | 0.3225 | 0.3225 | 0.9459 | 0.9459 |
| 1 | 24221817 | rs9424397  | G | T | 3 | 0.6205 | 0.6205 | 0.9736 | 0.9736 |
| 1 | 24221834 | rs9424398  | T | G | 3 | 0.6205 | 0.6205 | 0.9736 | 0.9736 |



## Western blotting

Midbrain region containing the PAG and substantia nigra of C57BL/6/J and DAT-Cnr2 (male, 3 month old) were homogenized mechanically in RIPA buffer (Santa Cruz Biotechnology) and centrifuged for 15 min at 12,000 RPM to collect supernatant. The level of tyrosine hydroxylase (TH) was measured by immunoprecipitation. Briefly, samples were mixed with an equal volume of Laemmli buffer, heated at 100 C for 5 min and separated on precast 4-20% SDS-polyacrylamide gels (Bio-Rad, Hercules, CA). The gel was activated for total protein quantitation and transferred to a PVDF membrane using Trans-Blot Turbo system (Bio-Rad, Hercules, CA). The membrane was placed in blocking solution (TBS with 1% Casein) for 1hr and incubated in anti-TH primary antibody (1:2000, Santa Cruz Biotechnology) overnight at room temperature. Membrane was washed in TBS, incubated in anti-rabbit secondary antibody (1:2000, Bio-Rad) for 1hr and visualized using ECL chemiluminescence solution (Bio-Rad). Image was acquired using the ChemiDoc XRS+ system and Image Lab software.

**SUPPLEMENTARY FIGURE S2. Representative Western blot image of TH in the midbrain of naïve C57Bl6/J and DAT-Cnr2 cKO mice.** The TH expression was observed in undiluted (1:1) and one-half dilution (1:2) protein loads, showing the expression of TH in the midbrain of DAT-Cnr2 cKO mice when compared to the WT mice.

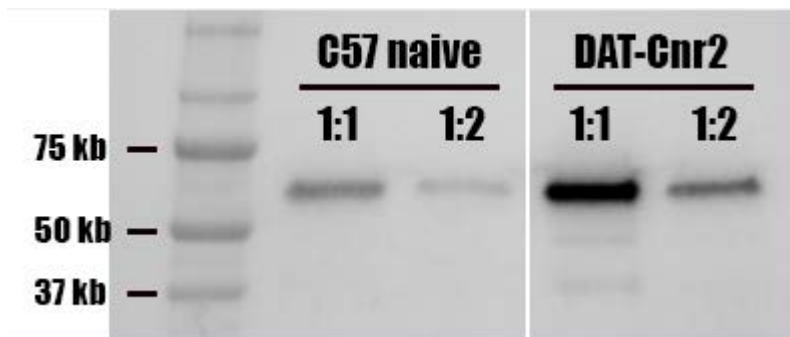



**Table S3. Primers for *Cnr2*-flox and DAT-*Cre* transgenic mice**

| <b>Transgenic mouse</b> | <b>Primer name</b> | <b>Primer sequence</b>       |
|-------------------------|--------------------|------------------------------|
| <i>Cnr2</i> -flox       | NDEL1              | GGTCAAGAATTATGATGCCCTAAGGACC |
|                         | NDEL2              | CCCAACTCCTTCTGCTTATCCTTCAGG  |
| DAT- <i>Cre</i>         | Com F              | TGGCTGTTGGTGTAAGTGG          |
|                         | DAT-WT-F           | GGACAGGGACATGGTTGACT         |
|                         | DAT-KO -R          | CCAAAAGACGGCAATATGGT         |
